# Supplementary material for: Five Novel Polymorphs of Cardarine/GW501516 and Their Characterization by X-ray Diffraction, Computational Methods, Thermal Analysis and a Pharmaceutical Perspective
Source: MDPI journal article supplement (doi:10.3390/pharmaceutics16050623), 2024-05-07
Supplement: s1 [file s1]

## Supporting information

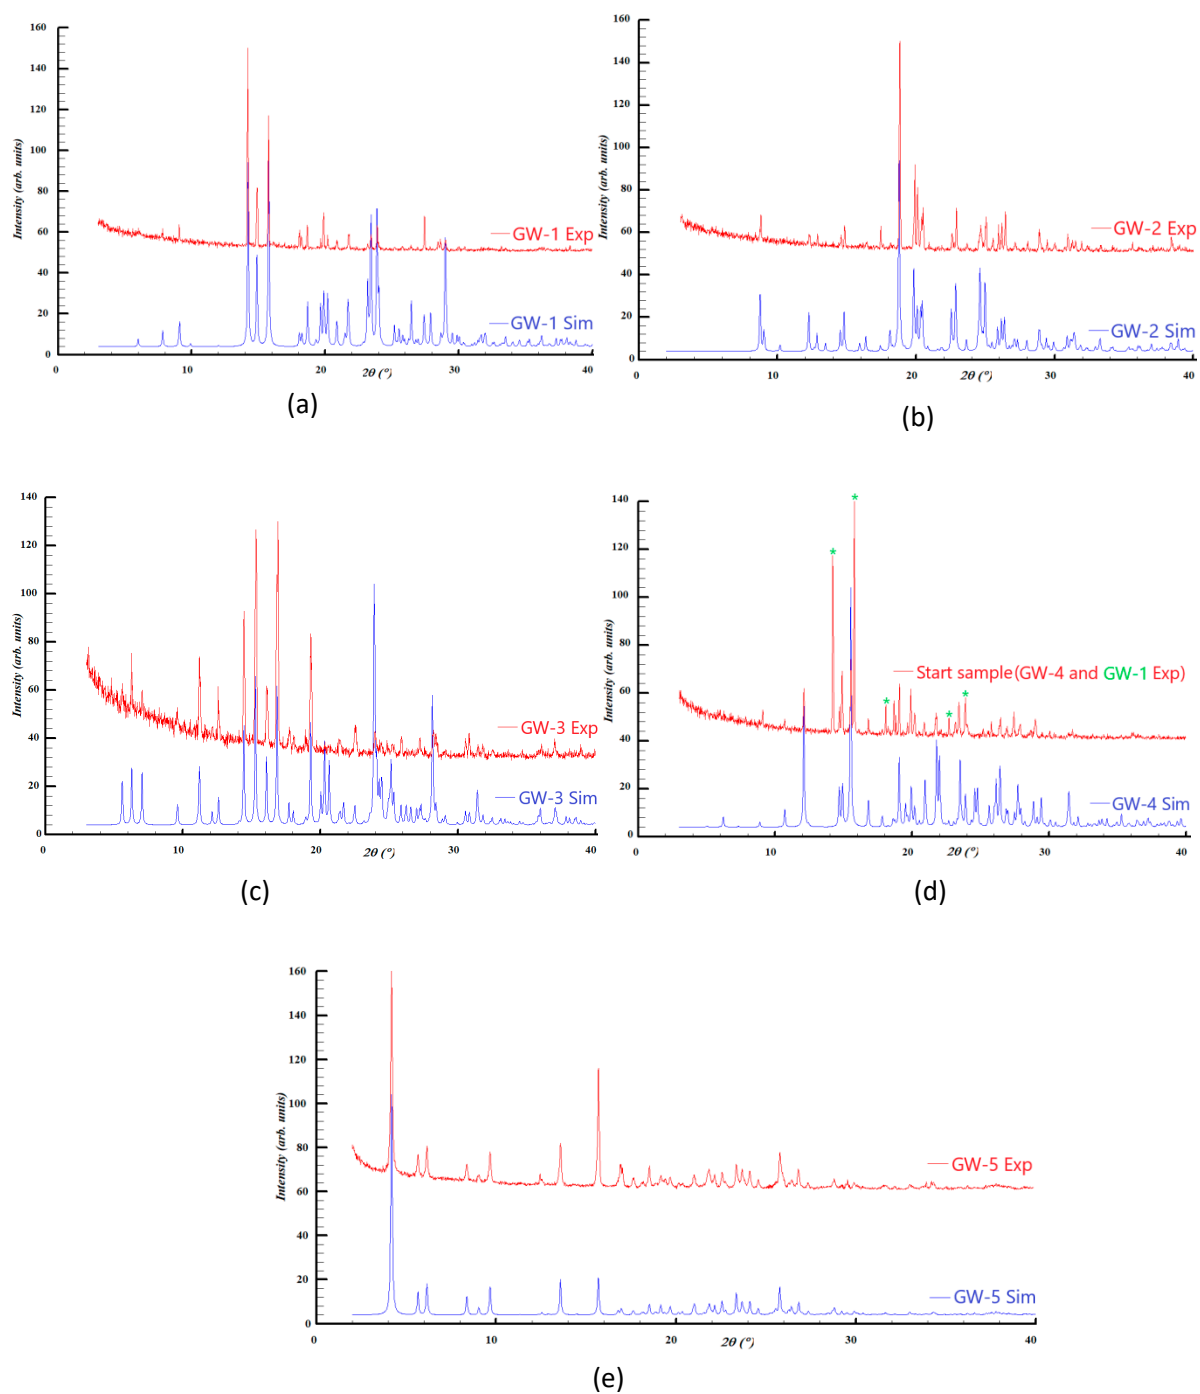

**Figure S1.** Experimental (Exp) and simulated (Sim) X-Ray diffraction patterns comparison for studied polymorphs: GW-1 (a), GW-2 (b), GW-3 (c), GW-4 (d), GW-5 (e)

**Table S1.** Nature and magnitudes of intermolecular interaction energies for selected intermolecular contacts (kJ/mol)

| Crystal | Interaction pair                        | Contact                                                                                                 | E <sub>ele</sub> | E <sub>pol</sub> | E <sub>disp</sub> | E <sub>rep</sub> | E <sub>tot</sub> |
|---------|-----------------------------------------|---------------------------------------------------------------------------------------------------------|------------------|------------------|-------------------|------------------|------------------|
| GW-1    |                                         | O3-H3...N1<br>C11-H11...O3<br>C6-H16...O2                                                               | -58.2            | -13.4            | -21.0             | 0                | -92.6            |
|         |                                         | C20-H20B...O3<br>C20-H20A...C14 (C-H... $\pi$ )<br>C20-H20A...C15 (C-H... $\pi$ )                       | -18.0            | -2.4             | -86.7             | 34.0             | -73.1            |
|         |                                         | C4-H4...O2                                                                                              | -23.4            | -4.5             | -28.0             | 21.1             | -34.8            |
|         |                                         | C3-H3...H11A-C11                                                                                        | -3.7             | -0.5             | -13.8             | 4.9              | -13.1            |
|         |                                         | C14-H14...S2                                                                                            | -8.0             | -2.1             | -30.3             | 14.7             | -25.5            |
| GW-2    |                                         | O3-H3...N1<br>C6-H6...O3                                                                                | -67.5            | -12.3            | -30.0             | 55.5             | -54.3            |
|         |                                         | C4-H4...O3<br>C14-H14...C3<br>C15-H15...F2                                                              | -13.4            | -1.6             | -46.1             | 20.1             | -41.0            |
|         |                                         | C12-H12B...O2<br>C11-H11B...O2<br>C20-H20A...C14 (C-H... $\pi$ )                                        | -26.1            | -3.2             | -31.4             | 0                | -60.7            |
|         |                                         | C11-H11A...F3                                                                                           | -5.8             | -0.7             | -18.8             | 0                | -25.3            |
|         |                                         | C19-H19A...H11C-C11                                                                                     | -0.5             | -0.2             | -7.0              | 2.8              | -4.9             |
| GW-3    |                                         | O3-H3...N1<br>O3-H3...C10                                                                               | -46.9            | -12.6            | -18.7             | 0                | -77.6            |
|         |                                         | C12-H12B...S2<br>C20-H20A...C16 (C-H... $\pi$ )                                                         | -17.6            | -2.5             | -88.7             | 35.9             | -72.9            |
|         |                                         | C6-H6...O3                                                                                              | -3.5             | -0.6             | -13.1             | 0                | -17.2            |
|         |                                         | C20-H20B...O2                                                                                           | -12.4            | -2.2             | -7.1              | 0                | -21.7            |
| GW-4    | Molecule A-Molecule B (asymmetric unit) | O3A-H3A...O2B<br>O3B-H3B...O2A                                                                          | -114.6           | -23.7            | -9.8              | 0                | -148.1           |
|         | Molecule A-Molecule A                   | C20A-H20A...C14A (C-H... $\pi$ )<br>C20A-H20A...C15A (C-H... $\pi$ )<br>C11A-H11C...C8A (C-H... $\pi$ ) | -19.7            | -3.2             | -86.6             | 34.6             | -74.9            |
|         | Molecule A-Molecule B                   | C21B...O3A<br>C21A...O3B                                                                                | 10.7             | -2.1             | -15.3             | 0                | -6.7             |
|         | Molecule A-Molecule B                   | S1A ...F3B                                                                                              | -1.3             | -0.4             | -11.1             | 0                | -12.8            |
|         | Molecule A-Molecule B                   | C11A-H11B...H11F-C11B<br>C11A-H11B...H14B-C14B                                                          | -5.5             | -1.3             | -25.0             | 9.1              | -22.7            |
|         | Molecule A-Molecule B                   | C12A-H12A...C2B                                                                                         | -2.1             | -0.5             | -18.5             | 53.              | -15.8            |
|         | Molecule A-Molecule B                   | C7B-H7B...O2A                                                                                           | -10.7            | -2.4             | -14.1             | 8.3              | -18.9            |
|         | Molecule A-Molecule B                   | F1A ...S1B                                                                                              | -2.3             | -0.5             | -18.5             | 6.8              | -14.5            |
|         | Molecule A-Molecule B                   | C12B-H12B...F3A                                                                                         | -4.3             | -0.4             | -13.3             | 0                | -18.0            |
|         | Molecule A-Molecule B                   | C7A-H7A...O2B                                                                                           | -9.9             | -2.2             | -13.9             | 7.3              | -18.7            |
|         | Molecule B-Molecule B                   | C20B-H20C...O2B<br>C20B-H20D...C14B (C-H... $\pi$ )<br>C20B-H20D...C15B (C-H... $\pi$ )                 | -19.3            | -2.7             | -86.2             | 35.5             | -72.7            |
|         | Molecule B-Molecule B                   | C19B-H19F...F1B                                                                                         | -2.3             | -0.1             | -4.0              | 0                | -6.4             |
| GW-5    | Molecule A-Molecule A                   | O3A-H3A...O2A                                                                                           | -106.4           | -23.5            | -10.9             | 0                | -140.8           |
|         | Molecule A-Molecule A                   | O20A-H20D...C15A (C-H... $\pi$ )<br>O20A-H20D...C14A (C-H... $\pi$ )<br>C19A-H19F...O2A                 | -9.5             | -3.2             | -81.4             | 25.8             | -68.3            |
|         | Molecule A-Molecule B (asymmetric unit) | O3B-H3B...N1A<br>C6A-H6A...O2B<br>C11A-H11F...O3B                                                       | -47.6            | -13.5            | -27.5             | 0                | -88.6            |
|         | Molecule A-Molecule B                   | C19B-H19B...O3A                                                                                         | -2.8             | -0.7             | -10.7             | 0                | -14.2            |
|         | Molecule A-Molecule A                   | C3A-H3AA...F3A                                                                                          | -8.9             | -0.6             | -9.4              | 0                | -18.9            |
|         | Molecule A-Molecule B                   | C19A-H19E...H20B-C20B                                                                                   | 1.1              | -1.1             | -12.0             | 0                | -12.0            |
|         | Molecule A-Molecule B                   | C6A...O3B<br>C7A...O3B                                                                                  | 2.5              | -0.6             | -14.4             | 0                | -12.5            |
|         | Molecule B-Molecule B                   | C12B-H12B...S1B<br>C12B-H12A...C13B (C-H... $\pi$ )<br>C12B-H12A...C18B (C-H... $\pi$ )                 | -23.0            | -4.3             | -92.5             | 37.9             | -82.2            |

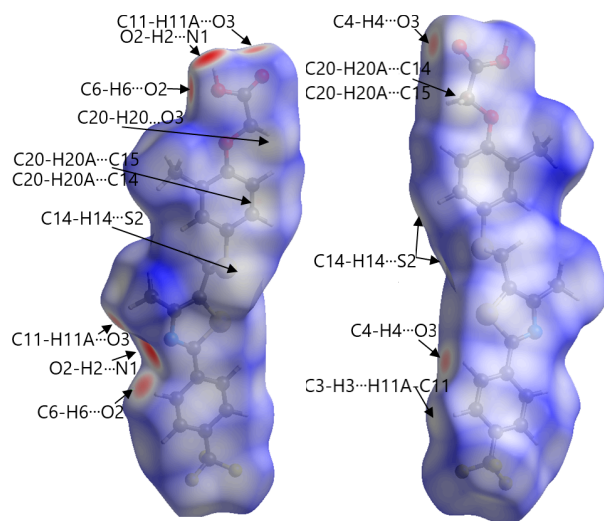

(a) GW-1

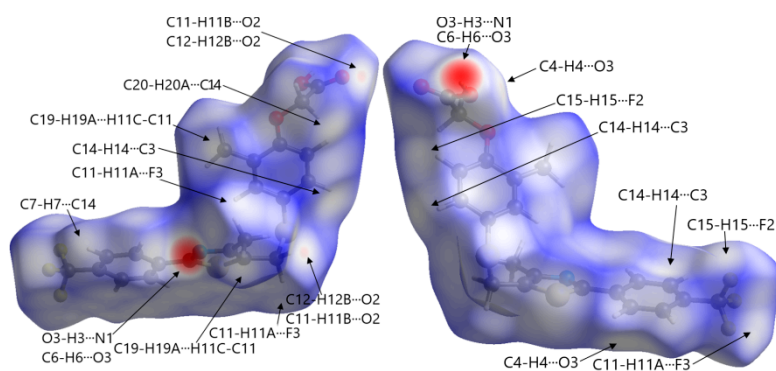

(b) GW-2

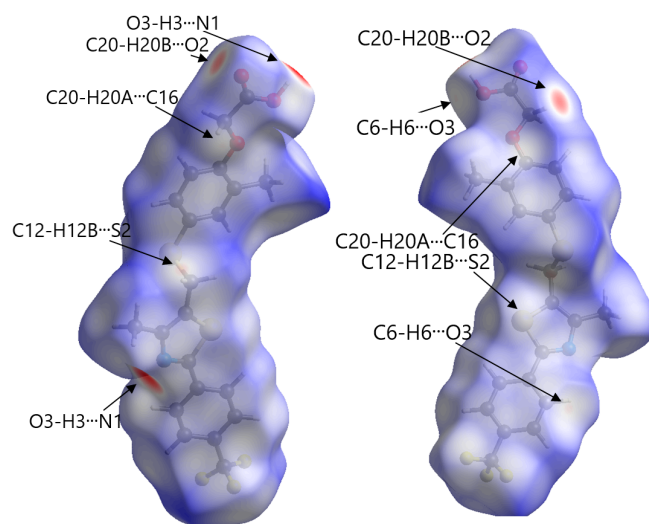

(c) GW-3

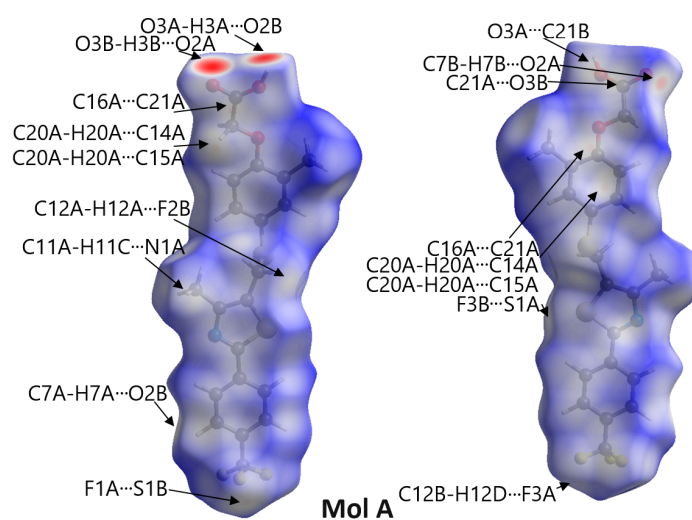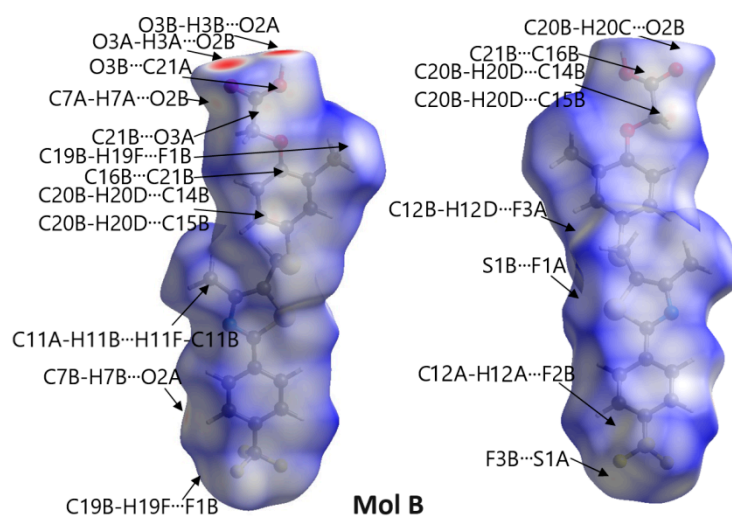

(d) GW-4

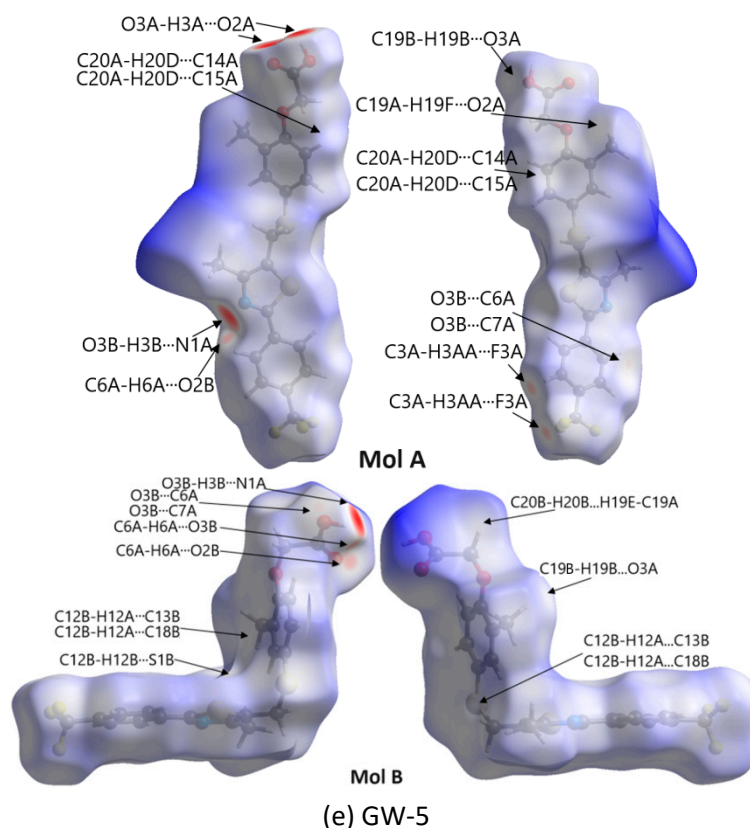

**Figure S2.** Hirshfeld surfaces mapped with dnrm illustrating the contacts referred to in Table S2. Surfaces were represented with the color scale in the ranges as follows:  $-0.63$  (red) to  $1.41$  (blue) for GW-1 (a);  $-0.67$  (red) to  $1.51$  (blue) for GW-2 (b),  $-0.68$  (red) to  $1.71$  (blue) for GW-3 (c),  $-0.74$  (red) to  $1.34$  (blue) for GW-4 (d),  $-0.62$  (red) to  $2.83$  (blue) for GW-5 (e)

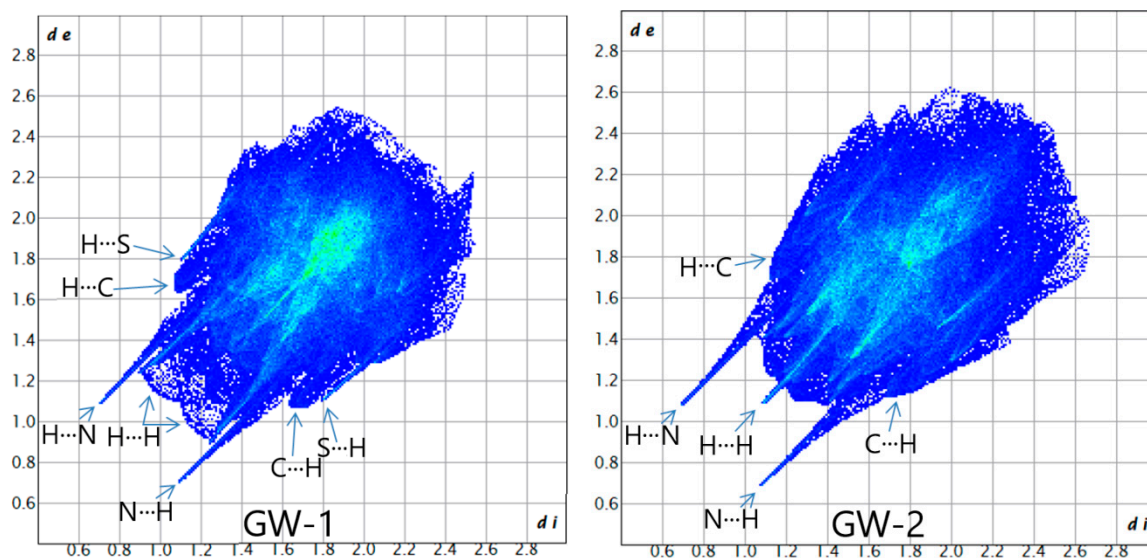

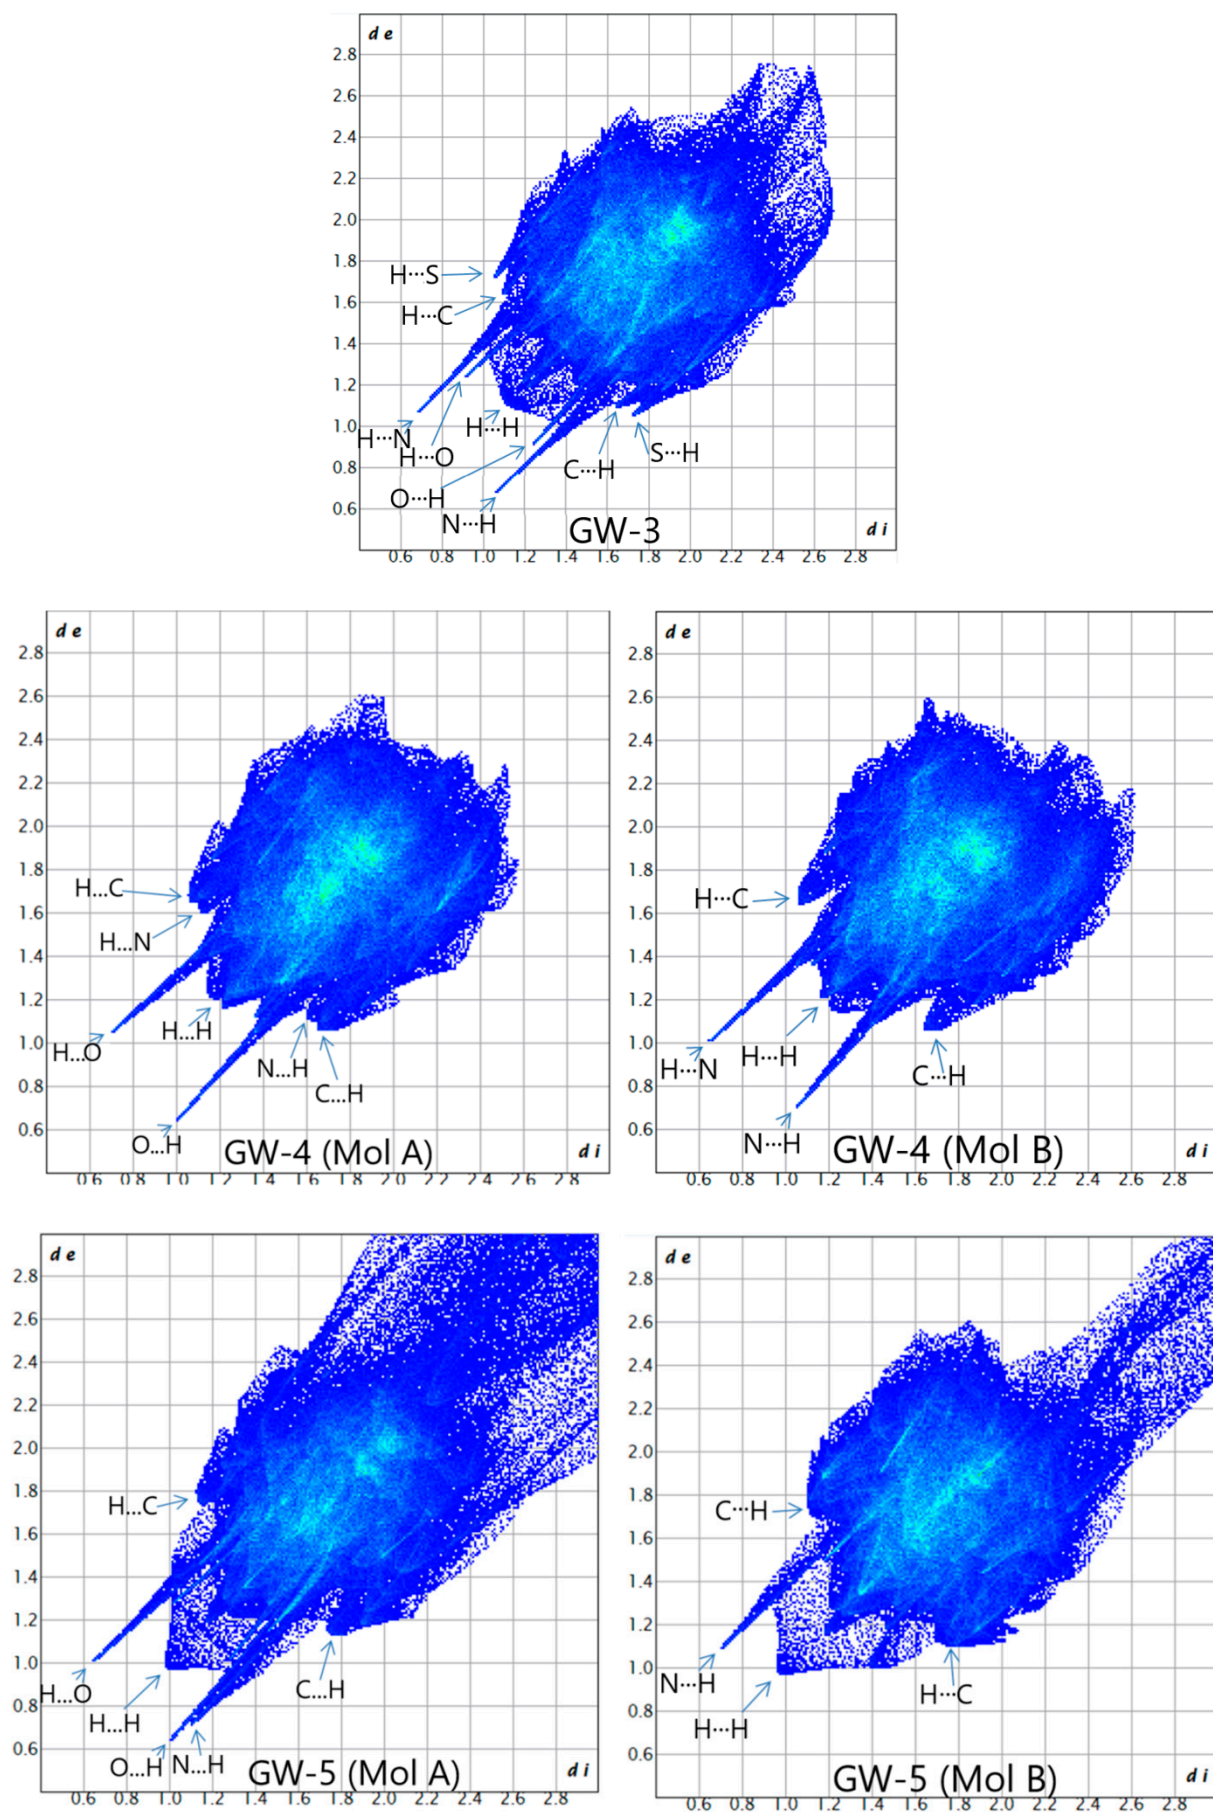

**Figure S3.** Fingerprint plots of analyzed polymorphs



*Table S2. Intermolecular pairwise interactions for studied polymorphs (Å, °)*

| Structure | D-H...A             | D-H   | H...A    | D...A    | <(D-H...A) |
|-----------|---------------------|-------|----------|----------|------------|
| GW-1      | C11-H11A...O3       | 1.089 | 2.247(3) | 3.255(1) | 119.6(4)   |
|           | O2-H2...N1          | 0.993 | 1.804(2) | 2.768(1) | 162.7(1)   |
|           | O3-H3...N1          | 1.089 | 2.158(3) | 3.214(1) | 162.1(5)   |
|           | C20-H20...O3        | 1.089 | 2.611(5) | 3.434(2) | 131.7(4)   |
|           | C20-H20A...C15      | 1.089 | 2.743(2) | 3.640(4) | 139.4(4)   |
|           | C20-H20A...C14      | 1.089 | 2.787(5) | 3.777(2) | 151.1(1)   |
|           | C14-H14...S2        | 1.089 | 2.928(2) | 4.001(2) | 168.3(7)   |
|           | C11-H11A...O3       | 1.089 | 2.247(2) | 3.255(1) | 153.1(1)   |
|           | C4-H4...O3          | 1.089 | 2.267(3) | 3.167(2) | 138.6(3)   |
|           | C3-H3...H11A-C11    | 1.089 |          | 2.372(3) |            |
| GW-2      | C11-H11B...O2       | 1.089 | 2.604(2) | 3.584(2) | 149.3(3)   |
|           | C12-H11B...O2       | 1.089 | 2.502(1) | 3.573(3) | 167.6(2)   |
|           | C20-H20A...C14      | 1.089 | 2.763(2) | 3.838(2) | 169.4(3)   |
|           | C21-H21B...H21B-C21 | 1.089 |          | 2.170(1) |            |
|           | C14-H14...C3        | 1.089 | 2.812(5) | 3.891(2) | 170.1(1)   |
|           | C11-H11A...F3       | 1.089 | 2.607(1) | 3.379(1) | 127.3(3)   |
|           | C7-H7...C14         | 1.089 | 2.856(2) | 3.777(2) | 142.4(2)   |
|           | O3-H3...N1          | 0.993 | 1.759(2) | 2.709(1) | 159.1(1)   |
|           | C6-H6...O3          | 1.089 | 2.603(2) | 3.392(2) | 129.3(1)   |
|           | C4-H4...O3          | 1.089 | 2.552(4) | 3.192(1) | 116.6(6)   |
|           | C15-H15...F2        | 1.089 | 2.604(3) | 3.384(2) | 127.8(2)   |
|           |                     |       |          |          |            |
| GW-3      | O3-H3...N1          | 0.993 | 1.743(2) | 2.732(1) | 173.2(1)   |
|           | C20-H20B...O2       | 1.089 | 2.162(5) | 3.238(3) | 169.2(1)   |
|           | C20-H20A...C16      | 1.089 | 2.741(1) | 3.754(4) | 154.6(5)   |
|           | C12-H12B...S2       | 1.089 | 2.784(3) | 3.771(1) | 150.5(2)   |
|           | C6-H6...O3          | 1.089 | 2.661(1) | 3.166(3) | 107.7(1)   |
|           | C18-H18B...H2B-C2   | 1.089 |          | 2.231(2) |            |
| GW-4      | O3A-H3A...O2B       | 0.993 | 1.751(2) | 2.617(2) | 143.5(6)   |
|           | O3B-H3B...O2A       | 0.993 | 1.647(3) | 2.611(1) | 162.4(3)   |
|           | C21A...C16A         | 1.089 |          | 3.346(2) |            |
|           | C20A-H20A...C14A    | 1.089 | 2.721(1) | 3.771(2) | 162.1(2)   |
|           | C20A-H20A...C15A    | 1.089 | 2.759(1) | 3.673(3) | 141.3(5)   |
|           | C20B-H20D...C14B    | 1.089 | 2.711(3) | 3.753(2) | 159.9(8)   |
|           | C20B-H20D...C15B    | 1.089 | 2.743(2) | 3.644(4) | 139.9(1)   |
|           | C12A-H12A...F2B     | 1.089 | 2.561(2) | 3.506(3) | 144.7(1)   |
|           | C11A-H11C...N1A     | 1.089 | 2.726(2) | 3.764(1) | 159.3(1)   |
|           | C7A-H7A...O2B       | 1.089 | 2.475(1) | 3.275(3) | 129.3(1)   |
|           | C12B-H12D...F3A     | 1.089 | 2.482(2) | 3.411(2) | 142.3(8)   |
|           | F1A...S1B           |       |          | 3.211(1) |            |
|           | F3B...S1A           |       |          | 3.231(2) |            |
|           | O3A...C21B          |       |          | 3.171(2) |            |
|           | O3B...C21A          |       |          | 3.173(4) |            |
|           | C16A...C21A         |       |          | 3.346(3) |            |
|           | C16B...C21B         |       |          | 3.361(1) |            |
|           |                     |       |          |          |            |
|           |                     |       |          |          |            |
|           |                     |       |          |          |            |

|      |                       |       |          |          |          |
|------|-----------------------|-------|----------|----------|----------|
| GW-5 | C7B-H7B...O2A         | 1.089 | 2.412(1) | 3.247(2) | 132.3(2) |
|      | C19B-H19F...F1B       | 1.089 | 2.641(1) | 3.535(2) | 138.9(1) |
|      | O3B-H3B...N1A         | 1.089 | 1.813(1) | 2.706(1) | 148.1(2) |
|      | O3A-H3A...O2A         | 0.993 | 1.646(2) | 2.627(2) | 168.7(2) |
|      | C20A-H20D...O14A      | 1.089 | 2.891(4) | 3.926(4) | 158.8(1) |
|      | C20A-H20D...O15A      | 1.089 | 2.887(2) | 3.798(5) | 141.2(5) |
|      | C6A-H6A...O2B         | 1.089 | 2.421(1) | 3.483(2) | 164.2(2) |
|      | C19B-H19B...O3A       | 1.089 | 2.695(3) | 3.641(1) | 144.9(1) |
|      | C19A-H19F...O2A       | 1.089 | 2.601(1) | 3.551(2) | 145.3(3) |
|      | C3A-H3AA...F3A        | 1.089 | 2.291(3) | 3.376(2) | 174.1(1) |
|      | C12B-H12A...C13B      | 1.089 | 2.852(2) | 3.505(1) | 118.5(3) |
|      | C12B-H12A...C18B      | 1.089 | 2.886(2) | 3.804(2) | 142.1(1) |
|      | C12B-H12B...S1B       | 1.089 | 2.915(2) | 3.753(2) | 133.8(5) |
|      | C20B-H20B...H19E-C19A | 1.089 |          | 2.259(3) |          |
|      | O3B...C6A             |       |          | 3.153(1) |          |
|      | O3B...C7A             |       |          | 3.193(5) |          |

**Table S3.** Contributions to the Hirshfeld diagrams for various contacts

| Structure  | H...H | F...H/H...F | O...H/H...O | C...H/H...C | S...H/H...S | S...C/C...S | C...C | Others |
|------------|-------|-------------|-------------|-------------|-------------|-------------|-------|--------|
| GW-1       | 33.2% | 14.6%       | 11.8%       | 11.5%       | 7.6%        | 4.8%        | 3.4%  | 13.1%  |
| GW-2       | 30.1% | 22.0%       | 14.6%       | 11.5%       | 6.9%        | 4.6%        | 2.7%  | 7.6%   |
| GW-3       | 32.2% | 14.4%       | 13.5%       | 9.7%        | 11.3%       | 1.0%        | 5.3%  | 12.6%  |
| GW-4 Mol A | 34.2% | 16.7%       | 9.5%        | 12.6%       | 8.2%        | 2.2%        | 3.0%  | 13.6%  |
| GW-4 Mol B | 33.1% | 15.8%       | 10.2%       | 12.9%       | 8.5%        | 2.3%        | 3.2%  | 12.1%  |
| GW-5 Mol A | 36.3% | 11.3%       | 14.6%       | 8.9%        | 8.0%        | 2.1%        | 4.1%  | 14.7%  |
| GW-5 Mol B | 31.9% | 8.7%        | 13.7%       | 14.2%       | 10.7%       | 0.8%        | 3.2%  | 16.8%  |

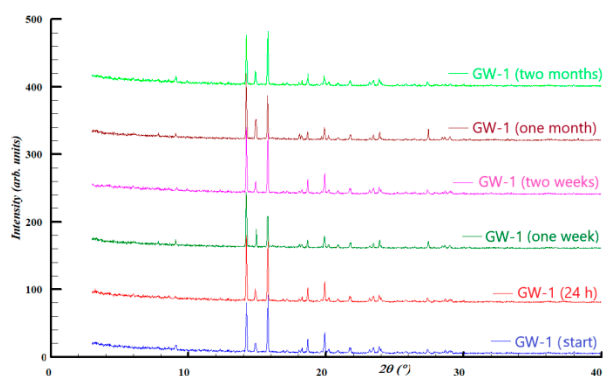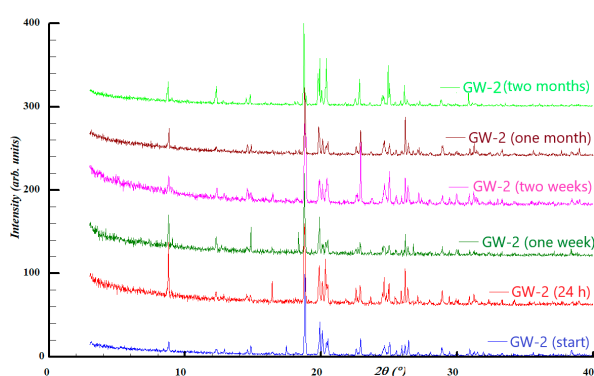



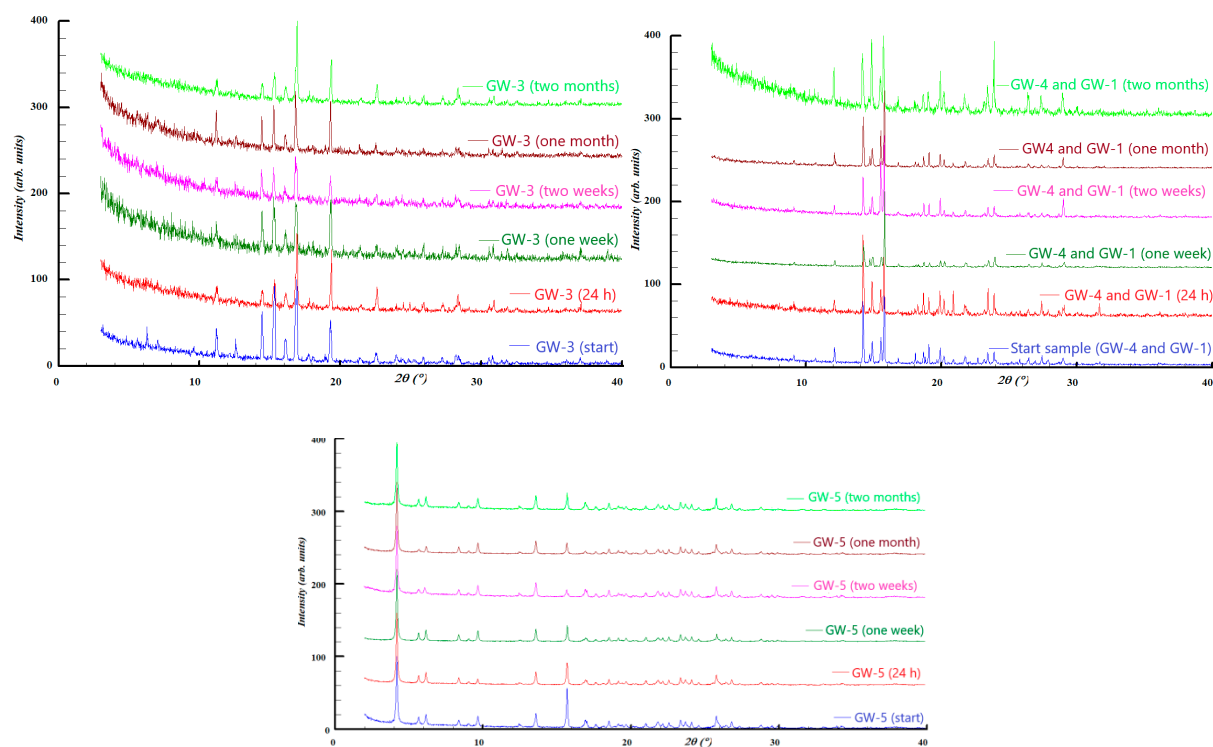

**Figure S4.** X-Ray diffraction patterns of the polymorphs kept in the climatic chamber
